# Supplementary material for: Unveiling the potentials of Lawsonia inermis L.: its antioxidant, antimicrobial, and anticancer potentials
Source: PeerJ. 2025 Apr 9;13:e19170. doi: 10.7717/peerj.19170 (PMC11992976; doi:10.7717/peerj.19170)
Supplement: Supplemental Information 1 [file peerj-13-19170-s001.xlsx]

## Sheet: % Yield
		repeat 1	repeat 2	repeat 3	Average	SD
	HenE	9.5352	8.8988	8.6938
	% Yield	19.0704	17.7976	17.3876	18.0852	0.87749
	HenM	9.9628	9.5355	9.8972
	% Yield	19.9256	19.071	19.7944	19.597	0.460229
	HenC	3.2772	3.2707	4.4395
	% Yield	6.5544	6.5414	8.879	7.32493	1.34588
	HenH	2.3655	1.8959	2.7277
	% Yield	4.731	3.7918	5.4554	4.6594	0.834108
	HenW	14.0072	14.813	14.41
	% Yield	28.0144	29.626	28.82	28.8201	0.8058

## Sheet: TPC
	Absorbance
Gallic acid (mg/L)	repeat 1	repeat 2	repeat 3	Average
0	0.029	0.037	0.03	0.032
10	0.131	0.136	0.139	0.135333
25	0.313	0.283	0.304	0.3
50	0.584	0.579	0.555	0.572667
75	0.837	0.85	0.804	0.830333
100	1.084	1.072	1.074	1.07667
10	0.135333
25	0.3
50	0.572667
75	0.830333
100	1.07667
	weight (g)	repeat	Abs	C	/1000 (mg/ml)	TPC (mg GAE/g extract)
HenE	0.0137	1	2.38	223.038	0.223038	162.802	162.802
		2	2.4	224.943	0.224943	164.192	164.192
		3	2.37	222.086	0.222086	162.106	162.106
		4	2.3	215.419	0.215419	157.24
						Average	163.033
						SD	1.06189
						%SD	0.651332
HenM	0.0183	1	2.98	280.181	0.280181	153.104	153.104
		2	2.9	272.562	0.272562	148.941
		3	2.97	279.229	0.279229	152.584	152.584
		4	2.95	277.324	0.277324	151.543	151.543
						Average	152.41
						SD	0.794965
						%SD	0.521595
HenC	0.0123	1	0.349	29.6095	0.0296095	24.0728	24.0728
		2	0.343	29.0381	0.0290381	23.6082
		3	0.373	31.8952	0.0318952	25.9311	25.9311
		4	0.366	31.2286	0.0312286	25.3891	25.3891
						Average	25.131
						SD	0.955659
						%SD	3.80271
HenH	0.0138	1	0.22	17.3238	0.0173238	12.5535	12.5535
		2	0.217	17.0381	0.0170381	12.3464
		3	0.223	17.6095	0.0176095	12.7605	12.7605
		4	0.219	17.2286	0.0172286	12.4845	12.4845
						Average	12.5995
						SD	0.143662
						%SD	1.14022
HenW	0.0158	1	2.12	198.276	0.198276	125.491	125.491
		2	2.1	196.371	0.196371	124.286	124.286
		3	2.1	196.371	0.196371	124.286	124.286
		4	1.99	185.895	0.185895	117.655
						Average	124.688
						SD	0.696022
						%SD	0.558213

## Sheet: TFC
	Absorbance
Quercetin (mg/ml)	repeat 1	repeat 2	repeat 3	Average
0.1	0.118	0.095	0.122	0.111667
0.25	0.199	0.201	0.203	0.201
0.5	0.314	0.329	0.321	0.321333
0.75	0.44	0.447	0.457	0.448
1	0.533	0.561	0.531	0.541667
1.25	0.578	0.548	0.507	0.544333
	0.1	0.111667
	0.25	0.201
	0.5	0.321333
	0.75	0.448
	1	0.541667
	weight (g)	repeat	Abs	C	TFC (mg QE/g extract)
HenE	0.0109	1	0.317	0.50386	462.257	462.257
		2	0.316	0.501773	460.343	460.343
		3	0.321	0.512205	469.913	469.913
		4	0.311	0.491342	450.772
					Average	464.171
					SD	5.06425
					%SD	1.09103
HenM	0.0112	1	0.324	0.518464	462.915	462.915
		2	0.326	0.522637	466.64	466.64
		3	0.334	0.539328	481.543	481.543
		4	0.302	0.472564	421.932
					Average	470.366
					SD	9.8572
					%SD	2.09564
HenC	0.01	1	0.13	0.113707	113.707	113.707
		2	0.123	0.0991029	99.1029	99.1029
		3	0.201	0.26184	261.84
		4	0.121	0.0949301	94.9301	94.9301
					Average	102.58
					SD	9.85983
					%SD	9.61183
HenH	0.01	1	0.113	0.0782391	78.2391	78.2391
		2	0.206	0.272272	272.272
		3	0.115	0.0824119	82.4119	82.4119
		4	0.112	0.0761527	76.1527	76.1527
					Average	78.9346
					SD	3.18699
					%SD	4.03751
HenW	0.0105	1	0.101	0.0532026	50.6691	50.6691
		2	0.066	-0.0198206	-18.8767
		3	0.102	0.055289	52.6562	52.6562
		4	0.101	0.0532026	50.6691	50.6691
					Average	51.3315
					SD	1.14721
					%SD	2.2349

## Sheet: HPLC
	gallic acid (µg/ml)	Area				chlorogenic acid (µg/ml)	Area				catechin (µg/ml)	Area					Ellagic acid (µg/ml)	Area					Apigetrin (µg/ml)	Area					Lawsone (µg/ml)	Area					Quercetin (µg/ml)	Area
	1	69314				2	61172				2	30580					20	27095					2	61837					1	106430					10	224
	2	133107				4	134020				4	68614					30	127385					4	147464					2	230712					20	1421
	3	196620				6	206611				6	106321					40	329219					6	286603					3	353613					30	4604
	4	270166				8	281480				8	147251					60	792122					8	391854					4	481413					40	22626
	5	322616				10	367096				10	188126					70	950278					10	465085					5	603752					50	262990
																	80	1246140																	60	539036
																																			70	312824
																																			80	895638
																																			90	937410
																																			40	22626
																																			50	262990
																																			60	539036
																																			80	895638
	Area	Conc. (µg/ml)	average	sd							Area	Conc. (µg/ml)	average	sd			Area	Conc. (µg/ml)	average	sd			Area	Conc. (µg/ml)	average	sd			Area	Conc. (µg/ml)	average	sd			Area	Conc. (µg/ml)	average	sd
Hen E	72840	1.04984	1.03376	0.0160877						Hen E	155542	8.40609	7.96512	0.718694		Hen E	182893	30.7788	30.7911	0.0636889		Hen E	115651	3.05169	3.07537	0.0236091		Hen E	14079	0.260963	0.289124	0.0178088		Hen E	388189	55.5846	55.7079	0.106916
	70769	1.01767									154506	8.35346					184566	30.8601					118132	3.09891					16681	0.281857					392323	55.7736
	71804.5	1.03376									130535	7.1358					181980	30.7345					116902	3.0755					18491	0.296391					392147	55.7656
Hen M	122780	1.82572	1.85144	0.0469046						Hen M	130483	7.13316	7.38833	0.255181		Hen M	220333	32.597	32.5244	0.0905815		Hen M	179495	4.26675	4.25664	0.0631859		Hen M	24810	0.347131	0.367836	0.0292813		Hen M	396044	55.9438	56.029	0.267862
	127920	1.90558									140530	7.64352					219434	32.5534					181986	4.31416					29967	0.388541					393208	55.8141
	122606	1.82302									135506	7.38831					216748	32.4229					175410	4.189					0	0					404468	56.3291
Hen C	5997	0.0113616	0.00905706	0.00279013						Hen C	24222	1.73536	1.76145	0.12097		Hen C	35520	23.622	23.6269	0.00947916		Hen C	2611	0.90035	0.900604	0.00106956		Hen C	10604	0.233059	0.22231	0.0133003		Hen C	2446	37.9417	0	0
	5649	0.00595501									27332	1.89334					35846	23.6379					2686	0.901778					7413	0.207436					2069	37.9245
	5900	0.00985458									22653	1.65566					35497	23.6209					2576	0.899684					9779	0.226434					0	0
Hen H	0		0	0						Hen H	0	0	0	0		Hen H	1215	21.9561	21.9637	0.0148077		Hen H	0	0				Hen H	2937	0.171494	0.170075	0.00619365		Hen H	406	37.8484	0	0.0012613
	0										0	0					1175	21.9542					0	0					1916	0.163295					445	37.8502
	0										0	0					1722	21.9807					0	0					3428	0.175437					0	0
Hen W	150569	2.25745	2.59406	0.604253						Hen W	1356	0.573824	0.565036	0.00774708		Hen W	46144	24.138	24.8976	0.664142		Hen W	2657	0.901226	0.884224	0.0147985		Hen W	22885	0.331674	0.298735	0.0829037		Hen W	222	37.84	0	0
	217136	3.29165									1068	0.559194					67731	25.1863					1239	0.874239					7038	0.204424					0	0
	149000	2.23308									1125	0.56209					71484	25.3685					1395	0.877208					26426	0.360108					0	0

## Sheet: DPPH
Ascorbic acid
DPPH + Methanol	average	SD
OD 517	1.328	0.02											blank	1.329									blank	1.329									blank	1.329										blank	1.329
Ascorbic acid (µg/ml)	sample	% free radical	average	SD							HenE (µg/ml)	sample	blank of sample	sample-blank	% free radical	average	SD				HenM (µg/ml)	sample	blank of sample	sample-blank	% free radical	average	SD				HenC (µg/ml)	sample	blank of sample	sample-blank	% free radical	average	SD				HenH (µg/ml)	sample	blank of sample	sample-blank	% free radical	average	SD
40	0.029	97.8163	98.0673	0.313504							1000	0.108	0.102	0.006	99.5485	98.4951	0.939804				1000	0.129	0.067	0.062	95.3348	95.9368	0.64289				1000	0.531	0.181	0.35	73.6644	72.8367	0.867762				1000	0.75	0.068	0.682	48.6832	47.9559	1.07031
	0.027	97.9669										0.126	0.102	0.024	98.1941							0.122	0.067	0.055	95.8616							0.536	0.163	0.373	71.9338							0.763	0.055	0.708	46.7269
	0.021	98.4187										0.132	0.102	0.03	97.7427							0.112	0.067	0.045	96.614							0.524	0.164	0.36	72.912							0.74	0.055	0.685	48.4575
35	0.089	93.2982	93.5994	0.588121							500	0.127	0.083	0.044	96.6892	97.4668	0.98203				500	0.12	0.049	0.071	94.6576	95.9117	1.10927				500	0.864	0.091	0.773	41.836	42.4128	0.501003				500	1.029	0.033	0.996	25.0564	25.859	0.790366
	0.076	94.2771										0.102	0.083	0.019	98.5704							0.098	0.049	0.049	96.313							0.854	0.093	0.761	42.7389							1.018	0.033	0.985	25.8841
	0.09	93.2229										0.121	0.083	0.038	97.1407							0.092	0.049	0.043	96.7645							0.858	0.096	0.762	42.6637							1.008	0.033	0.975	26.6366
30	0.188	85.8434	85.492	0.484119							250	0.103	0.034	0.069	94.8081	94.8081	0.376223				250	0.077	0.016	0.061	95.4101	95.0589	0.742345				250	1.102	0.053	1.049	21.0685	22.147	1.02159				250	1.174	0.024	1.15	13.4688	14.0456	0.69914
	0.19	85.6928										0.108	0.034	0.074	94.4319							0.075	0.016	0.059	95.5606							1.086	0.053	1.033	22.2724							1.156	0.024	1.132	14.8232
	0.2	84.9398										0.098	0.034	0.064	95.1843							0.093	0.016	0.077	94.2062							1.076	0.054	1.022	23.1001							1.169	0.024	1.145	13.845
25	0.409	69.2018	70.1556	0.839645							125	0.21	0.029	0.181	86.3807	86.2302	0.150489				125	0.196	0.014	0.182	86.3055	86.782	0.414415				125	1.197	0.044	1.153	13.243	12.2398	1.10159				125	1.266	0	1.266	4.74041	4.81565	0.344814
	0.392	70.4819										0.214	0.029	0.185	86.0798							0.186	0.014	0.172	87.0579							1.221	0.039	1.182	11.0609							1.26	0	1.26	5.19187
	0.388	70.7831										0.212	0.029	0.183	86.2302							0.187	0.014	0.173	86.9827							1.201	0.037	1.164	12.4153							1.269	0	1.269	4.51467
20	0.643	51.5813	51.2299	0.812183							62.5	0.514	0.025	0.489	63.2054	62.152	0.912292				62.5	0.532	0.01	0.522	60.7223	59.5435	1.91295				62.5	1.254	0.022	1.232	7.29872	6.42087	0.768576				62.5	1.3	0	1.3	2.18209	2.73389	0.828829
	0.64	51.8072										0.535	0.025	0.51	61.6253							0.577	0.01	0.567	57.3363							1.267	0.016	1.251	5.86907							1.28	0	1.28	3.68698
	0.66	50.3012										0.535	0.025	0.51	61.6253							0.534	0.01	0.524	60.5719							1.276	0.028	1.248	6.09481							1.298	0	1.298	2.33258
15	0.878	33.8855	33.2329	0.88245							31.25	0.856	0.011	0.845	36.4184	35.8415	0.53383				31.25	0.86	0	0.86	35.2897	34.161	0.978179				31.25	1.299	0.01	1.289	3.00978	3.83747	1.24324				31.25	1.362	0	1.362	-2.48307	0	0
	0.882	33.5843										0.865	0.011	0.854	35.7412							0.882	0	0.882	33.6343							1.296	0.01	1.286	3.23552							1.37	0	1.37	-3.08503
	0.9	32.2289										0.87	0.011	0.859	35.3649							0.883	0	0.883	33.5591							1.269	0.01	1.259	5.26712							1.385	0	1.385	-4.21369
10	1.083	18.4488	18.3233	0.428181							15.625	1.107	0	1.107	16.7043	16.5789	0.723027				15.625	1.1	0	1.1	17.231	17.7075	0.427859				15.625	1.323	0.005	1.318	0.82769	0.714823	0.159618				15.625	1.323	0.005	1.318	0.82769	0.351141	0.639947
	1.091	17.8464										1.119	0	1.119	15.8014							1.092	0	1.092	17.833							1.326	0.005	1.321	0.601956							1.326	0.005	1.321	0.601956
	1.08	18.6747										1.1	0	1.1	17.231							1.089	0	1.089	18.0587							1.339	0.005	1.334	-0.376223							1.339	0.005	1.334	-0.376223
5	1.296	2.40964	3.01205	0.855257							7.8125	1.257	0	1.257	5.41761	9.9072	4.51488				7.8125	1.118	0	1.118	15.8766	16.0773	0.77225				7.8125	1.327	0	1.327	0.150489	0	0				7.8125	1.327	0	1.327	0.150489	-5.55112e-15	0.615903
	1.293	2.63554										1.198	0	1.198	9.85704							1.124	0	1.124	15.4251							1.322	0	1.322	0.526712							1.322	0	1.322	0.526712
	1.275	3.99096										1.137	0	1.137	14.447							1.104	0	1.104	16.93							1.338	0	1.338	-0.677201							1.338	0	1.338	-0.677201
																						%
Ascorbic acid(µg/ml)																					1000	95.9368										%										%
40	98.0673										3.90625	1.267	0	1.267	#DIV/0!		#DIV/0!				500	95.9117									1000	72.8367									1000	47.9559
35	93.5994																				250	95.0589									500	42.4128									500	25.859
30	85.492											%									125	86.782									250	22.147									250	14.0456
25	70.1556										1000	98.4951									62.5	59.5435									125	12.2398									125	4.81565
20	51.2299										500	97.4668									31.25	34.161									62.5	6.42087									62.5	2.73389
15	33.2329										250	94.8081									15.625	17.7075									31.25	3.83747									31.25	0
10	18.3233										125	86.2302									7.8125	16.0773									15.625	0.714823									15.625	0.351141
5	3.01205										62.5	62.152																			7.8125	0									7.8125	-5.55112e-15
											31.25	35.8415
											15.625	16.5789
											7.8125	9.9072
	IC50
	19.78	19.7633	0.0472582
	19.71
	19.8
													IC50 of HenE								IC50 of HenM										IC50 of HenC
													46	46.6667	0.57735						48	49.6667	2.08167								610	608.333	2.88675
													47								52										605
													47								49										610
Ascorbic acid(µg/ml)											1000	99.5485									1000	95.3348									1000	73.6644
40	97.8163										500	96.6892									500	94.6576									500	41.836
35	93.2982										250	94.8081									250	95.4101									250	21.0685
30	85.8434										125	86.3807									125	86.3055									125	13.243
25	69.2018										62.5	63.2054									62.5	60.7223									62.5	7.29872
20	51.5813										31.25	36.4184									31.25	35.2897									31.25	3.00978
15	33.8855										15.625	16.7043									15.625	17.231									15.625	0.82769
10	18.4488										0.01	5.41761									0.01	15.8766									7.8125	0.150489
5	2.40964
																															1000	71.9338
Ascorbic acid(µg/ml)											1000	98.1941									1000	95.8616									500	42.7389
40	97.9669										500	98.5704									500	96.313									250	22.2724
35	94.2771										250	94.4319									250	95.5606									125	11.0609
30	85.6928										125	86.0798									125	87.0579									62.5	5.86907
25	70.4819										62.5	61.6253									62.5	57.3363									31.25	3.23552
20	51.8072										31.25	35.7412									31.25	33.6343									15.625	0.601956
15	33.5843										15.625	15.8014									15.625	17.833									7.8125	0.526712
10	17.8464										0.01	9.85704									0.01	15.4251
5	2.63554
											1000	97.7427									1000	96.614									1000	72.912
											500	97.1407									500	96.7645									500	42.6637
											250	95.1843									250	94.2062									250	23.1001
											125	86.2302									125	86.9827									125	12.4153
Ascorbic acid(µg/ml)											62.5	61.6253									62.5	60.5719									62.5	6.09481
40	98.4187										31.25	35.3649									31.25	33.5591									31.25	5.26712
35	93.2229										15.625	17.231									15.625	18.0587									15.625	0
30	84.9398										0.01	14.447									0.01	16.93									7.8125	0
25	70.7831
20	50.3012
15	32.2289
10	18.6747
5	3.99096

## Sheet: ABTS
	blank	0.577
Trolox (µg/ml)	sample	% free radical	average	SD				HenE (µg/ml)	sample	% free radical	average	SD				HenM (µg/ml)	sample	% free radical	average	SD				HenC (µg/ml)	sample	% free radical	average	SD				HenH (µg/ml)	sample	% free radical	average	SD				HenW (µg/ml)	sample	% free radical	average	SD
40	0.07	87.8683	86.944	1.05894				1000	0	100	100	0				1000	0	100	100	0				1000	0.098	83.0156	83.42	1.01551				1000	0.322	44.1941	43.5009	0.917072				1000	0	100	100	0
	0.074	87.175							0	100							0	100							0.089	84.5754							0.332	42.461							0	100
	0.082	85.7886							0	100							0	100							0.1	82.669							0.324	43.8475							0	100
35	0.122	78.8562	77.8163	0.917072				500	0.003	99.4801	99.6534	0.300182				500	0	100	100	0				500	0.273	52.6863	51.6464	1.03986				500	0.4	30.6759	30.907	0.264736				500	0.005	99.1334	99.4223	0.360774
	0.13	77.4697							0.003	99.4801							0	100							0.279	51.6464							0.397	31.1958							0.004	99.3068
	0.132	77.1231							0	100							0	100							0.285	50.6066							0.399	30.8492							0.001	99.8267
30	0.208	63.9515	63.2005	0.656142				250	0.003	99.4801	98.8446	0.608646				250	0.002	99.6534	99.8845	0.200121				250	0.418	27.5563	27.7874	0.557114				250	0.565	2.07972	1.90641	1.13647				250	0.098	83.0156	82.5534	0.529471
	0.214	62.9116							0.007	98.7868							0	100							0.413	28.4229							0.573	0.693241							0.104	81.9757
	0.215	62.7383							0.01	98.2669							0	100							0.419	27.383							0.56	2.94627							0.1	82.669
25	0.279	51.6464	51.4731	0.624879				125	0.04	93.0676	93.2409	0.624879				125	0.033	94.2808	95.3206	0.96495				125	0.49	15.078	14.7891	0.360774				125	0.586	-1.55979	0	0				125	0.205	64.4714	63.0272	1.32368
	0.284	50.7799							0.035	93.9341							0.022	96.1872							0.494	14.3847							0.585	-1.38648							0.215	62.7383
	0.277	51.9931							0.042	92.721							0.026	95.4939							0.491	14.9047							0.601	-4.15945							0.22	61.8718
20	0.338	41.4211	40.6124	0.721548				62.5	0.228	60.4853	60.6008	0.872309				62.5	0.209	63.7782	63.2005	0.721548				62.5	0.521	9.70537	9.24321	0.656142				62.5	0.2	65.338	0	0				62.5	0.4	30.6759	29.8671	0.872309
	0.344	40.3813							0.232	59.792							0.217	62.3917							0.522	9.53206							0.241	58.2322							0.404	29.9827
	0.346	40.0347							0.222	61.5251							0.211	63.4315							0.528	8.4922							0.238	58.7522							0.41	28.9428
15	0.425	26.3432	25.6499	0.624879				31.25	0.362	37.2617	36.6262	0.700425				31.25	0.356	38.3016	37.9549	1.24976				31.25	0.562	2.59965	3.23512	0.700425				31.25	0.356	38.3016	0	0				31.25	0.487	15.5979	15.6557	0.436155
	0.432	25.13							0.365	36.7418							0.352	38.9948							0.559	3.11958							0.352	38.9948							0.484	16.1179
	0.43	25.4766							0.37	35.8752							0.366	36.5685							0.554	3.98614							0.345	40.208							0.489	15.2513
10	0.484	16.1179	15.6557	0.400243				15.625	0.49	15.078	14.5003	1.15396				15.625	0.453	21.4905	22.0682	0.721548				15.625	0.562	2.59965	3.06181	0.656142				15.625	0.466	19.2374	0	0				15.625	0.534	7.45234	8.26112	0.872309
	0.488	15.4246							0.489	15.2513							0.451	21.8371							0.561	2.77296							0.482	16.4645							0.53	8.14558
	0.488	15.4246							0.501	13.1716							0.445	22.8769							0.555	3.81282							0.475	17.6776							0.524	9.18544
								7.8125	0.53	8.14558	7.10572	0.917072				7.8125	0.503	12.825	13.7493	0.872309				7.8125	0.56	2.94627	1.96418	1.04466				7.8125	0.532	7.79896	0	0				7.8125	0.563	2.42634	2.83073	1.1797
trolox (µg/ml)									0.538	6.7591							0.493	14.5581							0.565	2.07972							0.538	6.7591							0.553	4.15945
40	86.944								0.54	6.41248							0.497	13.8648							0.572	0.866551							0.542	6.06586							0.566	1.90641
35	77.8163
30	63.2005								%	SD							%	SD								%	SD							%	SD						1mg/ml	%	SD
25	51.4731							1000	100	0						1000	100	0							1000	83.42	1.01551						1000	43.5009	0.917072						1	100	0
20	40.6124							500	99.6534	0.300182						500	100	0							500	51.6464	1.03986						500	30.907	0.264736						0.5	99.4223	0.360774
15	25.6499							250	98.8446	0.608646						250	99.8845	0.200121							250	27.7874	0.557114						250	1.90641	1.13647						0.25	82.5534	0.529471
10	15.6557							125	93.2409	0.624879						125	95.3206	0.96495							125	14.7891	0.360774						125	0	0						0.125	63.0272	1.32368
								62.5	60.6008	0.872309						62.5	63.2005	0.721548							62.5	9.24321	0.656142						62.5	0	0						0.0625	29.8671	0.872309
								31.25	36.6262	0.700425						31.25	37.9549	1.24976							31.25	3.23512	0.700425						31.25	0	0						0.03125	15.6557	0.436155
								15.625	14.5003	1.15396						15.625	22.0682	0.721548							15.625	3.06181	0.656142						15.625	0	0						0.015625	8.26112	0.872309
								7.8125	7.10572	0.917072						7.8125	13.7493	0.872309							7.8125	1.96418	1.04466						7.8125	0	0						0.0078125	2.83073	1.1797
IC50 of trolox
24.0548	24.3346	0.242875						IC50 of HenE								IC50 of HenM								IC50 of HenC																IC50 of HenW
24.458								48	48.3333	0.57735						47	47.3333	0.57735						470	476.667	7.63763														97	99.6667	2.51661
24.491								49								48								475																100
								48								47								485																102
trolox (µg/ml)								1000	87.175
40	87.8683							500	77.4697							1000	100							1000	83.42															1000	100
35	78.8562							250	62.9116							500	100							500	52.6863															500	99.1334
30	63.9515							125	50.7799							250	99.6534							250	27.5563															250	83.0156
25	51.6464							62.5	40.3813							125	94.2808							125	15.078															125	64.4714
20	41.4211							31.25	25.13							62.5	63.7782							62.5	9.70537															62.5	30.6759
15	26.3432							15.625	15.4246							31.25	38.3016							31.25	2.59965															31.25	15.5979
10	16.1179							7.8125	0							15.625	21.4905							15.625	2.59965															15.625	7.45234
																7.8125	12.825							7.8125	2.94627															7.8125	2.42634
trolox (µg/ml)								1000	100
40	87.175							500	99.4801							1000	100							1000	84.5754															1000	100
35	77.4697							250	98.7868							500	100							500	51.6464															500	99.3068
30	62.9116							125	93.9341							250	100							250	28.4229															250	81.9757
25	50.7799							62.5	59.792							125	96.1872							125	14.3847															125	62.7383
20	40.3813							31.25	36.7418							62.5	62.3917							62.5	9.53206															62.5	29.9827
15	25.13							15.625	15.2513							31.25	38.9948							31.25	3.11958															31.25	16.1179
10	15.4246							7.8125	6.7591							15.625	21.8371							15.625	2.77296															15.625	8.14558
																7.8125	14.5581							7.8125	2.07972															7.8125	4.15945
								1000	100							1000	100							1000	82.669															1000	100
trolox (µg/ml)								500	100							500	100							500	50.6066															500	99.8267
40	85.7886							250	98.2669							250	100							250	27.383															250	82.669
35	77.1231							125	92.721							125	95.4939							125	14.9047															125	61.8718
30	62.7383							62.5	61.5251							62.5	63.4315							62.5	8.4922															62.5	28.9428
25	51.9931							31.25	35.8752							31.25	36.5685							31.25	3.98614															31.25	15.2513
20	40.0347							15.625	13.1716							15.625	22.8769							15.625	3.81282															15.625	9.18544
15	25.4766							7.8125	6.41248							7.8125	13.8648							7.8125	0.866551															7.8125	1.90641
10	15.4246

## Sheet: FRAP
	Absorbance
FeSO4.7H2O (mM)	repeat 1	repeat 2	repeat 3	Average
0.2	0.145	0.137	0.124	0.135333
0.4	0.289	0.267	0.246	0.267333
0.6	0.421	0.403	0.407	0.410333
0.8	0.513	0.512	0.546	0.523667
1	0.649	0.671	0.697	0.672333
	0.2	0.135333
	0.4	0.267333
	0.6	0.410333
	0.8	0.523667
	1	0.672333
	Absorbance
Extract	repeat 1	repeat 2	repeat 3	Average	SD
HenE	2.39	2.15	2.15
mmol	0.000358901	0.00032282	0.00032282
16.7	0.167	0.167	0.167
	2.14911	1.93305	1.93305	2.00507	0.124739	mmolFe2+/g
HenM	2.28	2.05	1.99
mmol	0.000342364	0.000307786	0.000298766
15.6	0.156	0.156	0.156
mmol	2.19464	1.97299	1.91516	2.0276	0.147523	mmolFe2+/g
HenC	0.473	0.507	0.494
mmol	7.07037e-05	7.58152e-05	7.38608e-05
18.1	0.181	0.181	0.181
	0.390628	0.418869	0.408071	0.405856	0.0142498	mmolFe2+/g
HenH	0.268	0.259	0.258
mmol	3.98845e-05	3.85315e-05	3.83812e-05
16.5	0.165	0.165	0.165
	0.241724	0.233524	0.232613	0.235954	0.00501815	mmolFe2+/g
HenW	1.59	1.57	1.61
mmol	0.000238631	0.000235624	0.000241637
18.4	0.184	0.184	0.184
	1.29691	1.28057	1.31325	1.29691	0.016341	mmolFe2+/g

## Sheet: Antibacteria
	Bacteria	สารสกัด	concentration (mg/ml)	Positive Conrol
			300	streptomycin	Ampicillin
	B.cereus	Ethanol	18	27	15
			18	26.5	15
			18	26	15
		average	18	26.5	15
		SD	0	0.5	0
		Methanol	18
			18
			19
		average	18.3333
		SD	0.57735
		Chloroform	8.5
			9
			9
		average	8.83333
		SD	0.288675
		Hexane	4
			4
			4
		average	4
		SD	0
		water	12
			12
			12
		average	12
		SD	0
	S.aureus	Ethanol	14	23	37
			15	23	36
			15	23	36
		average	14.6667	23	36.3333
		SD	0.57735	0	0.57735
		Methanol	17
			17
			17
		average	17
		SD	0
		Chloroform	10
			10
			10
		average	10
		SD	0
		Hexane	0
			0
			0
		average	0
		SD	0
		water	12
			11
			11.5
		average	11.5
		SD	0.5
	K.pneumoniae	Ethanol	4	23	19
			3.5	23	19
			3	22	20
		average	3.5	22.6667	19.3333
		SD	0.5	0.57735	0.57735
		Methanol	3.5
			3
			4
		average	3.5
		SD	0.5
		Chloroform	0
			0
			0
		average	0
		SD	0
		Hexane	0
			0
			0
		average	0
		SD	0
		water	0
			0
			0
		average	0
		SD	0
	P.aeruginosa	Ethanol	4	24.5	0
			4	25	0
			4	25	0
		average	4	24.8333	0
		SD	0	0.288675	0
		Methanol	4
			4
			4
		average	4
		SD	0
		Chloroform	0
			0
			0
		average	0
		SD	0
		Hexane	0
			0
			0
		average	0
		SD	0
		water	3
			3
			3
		average	3
		SD	0
	E. coli	Ethanol	4	23	28
			4	23	29
			4	22.5	28.5
		average	4	22.8333	28.5
		SD	0	0.288675	0.5
		Methanol	3
			3
			3
		average	3
		SD	0
		Chloroform	0
			0
			0
		average	0
		SD	0
		Hexane	0
			0
			0
		average	0
		SD	0
		water	0
			0
			0
		average	0
		SD	0
	S. typhimurium	Ethanol	3	24	34
			3	24	34
			3	25	34
		average	3	24.3333	34
		SD	0	0.57735	0
		Methanol	3
			3
			3
		average	3
		SD	0
		Chloroform	0
			0
			0
		average	0
		SD	0
		Hexane	0
			0
			0
		average	0
		SD	0
		water	0
			0
			0
		average	0
		SD	0

## Sheet: MIC&MBC
Extract		B.cereus
		concentration of extract (mg/ml)
		150	75	37.5	18.75	9.375	4.6875	2.34375	1.17188	0.585938	0.292969	0.146484	0.0732422
HenE	rep.1	80.5	28.7	6.33	2.02	1.89	1.63	2.25	2.14	2.13	1.62	2.02	2.58
	rep.2	78.1	30.1	7.19	2.54	2.35	1.61	2.46	2.58	2.39	2.14	3.32	3.8
	rep.3	80.2	29.8	6.21	2.09	2.03	1.84	2.36	2.27	2.25	1.63	3.25	3.75
	control	84.15	32.9	14.2667	3.50667	2.44	2.05	1.87	1.56567	1.37	0.933333	0.63	0.436667
	rep.1 - control	-3.65	-4.2	-7.93667	-1.48667	-0.55	-0.42	0.38	0.574333	0.76	0.686667	1.39	2.14333
	rep.2 - control	-6.05	-2.8	-7.07667	-0.966667	-0.09	-0.44	0.59	1.01433	1.02	1.20667	2.69	3.36333
	rep.3 - control	-3.95	-3.1	-8.05667	-1.41667	-0.41	-0.21	0.49	0.704333	0.88	0.696667	2.62	3.31333
	Average	-4.55	-3.36667	-7.69	-1.29	-0.35	-0.356667	0.486667	0.764333	0.886667	0.863333	2.23333	2.94
	SD	1.30767	0.737111	0.53454	0.282194	0.235797	0.12741	0.10504	0.226053	0.130128	0.297377	0.731186	0.690386
							0.843333	0.277667	0.122333	-0.0233333	1.37	0.706667
HenM	rep.1	80	42.2	7.19	2.02	2.35	2.44	2.94	1.84	1.57	1.62	2.02	2.58
	rep.2	88.1	41.7	6.33	2.09	2.03	2.61	2.86	1.82	1.49	1.63	1.64	2.3
	rep.3	85.2	40.6	6.21	2.54	1.89	1.63	2.26	2.04	1.55	1.58	1.78	2.33
	control	88.85	43.5	14.77	5.28	3.21667	2.56667	2.55333	1.51533	0.976667	0.726667	0.52	0.406667
	rep.1 - control	-8.85	-1.3	-7.58	-3.26	-0.866667	-0.126667	0.386667	0.324667	0.593333	0.893333	1.5	2.17333
	rep.2 - control	-0.75	-1.8	-8.44	-3.19	-1.18667	0.0433333	0.306667	0.304667	0.513333	0.903333	1.12	1.89333
	rep.3 - control	-3.65	-2.9	-8.56	-2.74	-1.32667	-0.936667	-0.293333	0.524667	0.573333	0.853333	1.26	1.92333
	Average	-4.41667	-2	-8.19333	-3.06333	-1.12667	-0.34	0.133333	0.384667	0.56	0.883333	1.29333	1.99667
	SD	4.10406	0.818535	0.53454	0.282194	0.235797	0.523673	0.371663	0.121655	0.0416333	0.0264575	0.19218	0.153731
								0.251333	0.175333	0.323333	0.41	0.703333
	rep.1	88.5	50.8	6.95	4.65	4	8.95	5.52	3.17	3.8	3.2	3.86	3.56
	rep.2	79.9	49.6	8.23	5.62	4.65	8.92	5.92	4.35	4.77	4.74	4.58	4.92
	rep.3	89.4	45.7	6.27	5.18	3.79	8.04	5.34	4.29	4.46	3.97	4.06	4.39
HenC	control	91.55	52.3	27.5	20.6	9.92333	8.21	4.98333	2.68	1.39667	0.863333	0.596667	0.47
	rep.1 - control	-3.05	-1.5	-20.55	-15.95	-5.92333	0.74	0.536667	0.49	2.40333	2.33667	3.26333	3.09
	rep.2 - control	-11.65	-2.7	-19.27	-14.98	-5.27333	0.71	0.936667	1.67	3.37333	3.87667	3.98333	4.45
	rep.3 - control	-2.15	-6.6	-21.23	-15.42	-6.13333	-0.17	0.356667	1.61	3.06333	3.10667	3.46333	3.92
	Average	-5.61667	-3.6	-20.35	-15.45	-5.77667	0.426667	0.61	1.25667	2.94667	3.10667	3.57	3.82
	SD	5.24436	2.66646	0.995188	0.485695	0.448367	0.516946	0.296873	0.66463	0.495412	0.77	0.371663	0.685493
								0.646667	1.69	0.16	0.463333	0.25
HenH	rep.1	88.3	71.2	5.92	4.62	11.58	7.73	4.87	3.28	2.49	2.26	2.38	3.98
	rep.2	95.6	65.5	5.26	4.63	12.08	8.03	5.11	2.89	2.48	2.15	2.27	3.28
	rep.3	85.1	74.5	8.62	5.06	11.56	7.89	5.06	2.71	2.83	3.65	3.76	4.12
	control	97.2	76.95	22.78	15.8833	11.3833	7.55667	4.72333	2.61333	1.51667	0.876667	0.626667	0.516667
	rep.1 - control	-8.9	-5.75	-16.86	-11.2633	0.196667	0.173333	0.146667	0.666667	0.973333	1.38333	1.75333	3.46333
	rep.2 - control	-1.6	-11.45	-17.52	-11.2533	0.696667	0.473333	0.386667	0.276667	0.963333	1.27333	1.64333	2.76333
	rep.3 - control	-12.1	-2.45	-14.16	-10.8233	0.176667	0.333333	0.336667	0.0966667	1.31333	2.77333	3.13333	3.60333
	Average	-7.53333	-6.55	-16.18	-11.1133	0.356667	0.326667	0.29	0.346667	1.08333	1.81	2.17667	3.27667
	SD	5.38176	4.55302	1.78022	0.251197	0.294618	0.150111	0.126623	0.291376	0.199249	0.836082	0.830321	0.450037
									0.736667	0.726667	0.366667	1.1
HenW	rep.1	81.5	51.23	10.21	8.94	6.13	3.86	2.04	1.52	2.45	2.66	2.95	2.63
	rep.2	80.9	45.6	10.54	8.5	6.51	3.81	2.58	1.36	3.55	3.12	3.86	3.79
	rep.3	78.5	48.2	10.03	9	5.81	3.03	2.62	1.44	3.52	2.84	4.11	4.28
	control	91.05	54.75	18.4467	8.33667	5.73	3.15667	1.91667	1.33667	0.78	0.563333	0.463333	0.386667
	rep.1 - control	-9.55	-3.52	-8.23667	0.603333	0.4	0.703333	0.123333	0.183333	1.67	2.09667	2.48667	2.24333
	rep.2 - control	-10.15	-9.15	-7.90667	0.163333	0.78	0.653333	0.663333	0.0233333	2.77	2.55667	3.39667	3.40333
	rep.3 - control	-12.55	-6.55	-8.41667	0.663333	0.08	-0.126667	0.703333	0.103333	2.74	2.27667	3.64667	3.89333
	Average	-10.75	-6.40667	-8.18667	0.476667	0.42	0.41	0.496667	0.103333	2.39333	2.31	3.17667	3.18
	SD	1.58745	2.81774	0.25865	0.273008	0.350428	0.465439	0.323934	0.08	0.626605	0.231805	0.610492	0.847368
									2.29	-0.0833333	0.866667	0.00333333
Extract		S.aureus
		concentration of extract (mg/ml)
		150	75	37.5	18.75	9.375	4.6875	2.34375	1.17188	0.585938	0.292969	0.146484	0.0732422
HenM	rep.1	80	42.2	4.05	2.23	2.5	1.82	1.74	1.63	1.86	1.9	2.99	3.33
	rep.2	88.1	38.5	3.82	2.19	2.28	2.43	1.54	1.9	1.59	1.96	3.16	4.25
	rep.3	78.4	37.4	4.89	2.21	2.22	1.8	1.45	1.06	1.55	1.76	3.02	3.36
	control	88.85	43.5	14.77	5.28	3.21667	2.56667	2.55333	1.51533	0.976667	0.726667	0.52	0.406667
	rep.1 - control	-8.85	-1.3	-10.72	-3.05	-0.716667	-0.746667	-0.813333	0.114667	0.883333	1.17333	2.47	2.92333
	rep.2 - control	-0.75	-5	-10.95	-3.09	-0.936667	-0.136667	-1.01333	0.384667	0.613333	1.23333	2.64	3.84333
	rep.3 - control	-10.45	-6.1	-9.88	-3.07	-0.996667	-0.766667	-1.10333	-0.455333	0.573333	1.03333	2.5	2.95333
	Average	-6.68333	-4.13333	-10.5167	-3.07	-0.883333	-0.55	-0.976667	0.0146667	0.69	1.14667	2.53667	3.24
	SD	5.20032	2.51462	0.563235	0.02	0.147422	0.358097	0.148436	0.428836	0.168622	0.102632	0.0907377	0.522717
									0.675333	0.456667	1.39	0.703333
HenE	rep.1	80.5	29.1	3.63	2.02	1.88	2.12	2	1.98	1.95	1.87	2.08	2.45
	rep.2	78.1	28.5	4.12	2.13	2.27	2.2	2.11	2.17	1.98	1.78	2.58	2.24
	rep.3	80.2	30.4	4.31	2.06	2.23	1.34	1.1	1.01	1.11	2.61	3.53	3.56
	control	84.15	32.9	14.2667	3.50667	2.44	2.05	1.87	1.56567	1.37	0.933333	0.63	0.436667
	rep.1 - control	-3.65	-3.8	-10.6367	-1.48667	-0.56	0.07	0.13	0.414333	0.58	0.936667	1.45	2.01333
	rep.2 - control	-6.05	-4.4	-10.1467	-1.37667	-0.17	0.15	0.24	0.604333	0.61	0.846667	1.95	1.80333
	rep.3 - control	-3.95	-2.5	-9.95667	-1.44667	-0.21	-0.71	-0.77	-0.555667	-0.26	1.67667	2.9	3.12333
	Average	-4.55	-3.56667	-10.2467	-1.43667	-0.313333	-0.163333	-0.133333	0.154333	0.31	1.15333	2.1	2.31333
	SD	1.30767	0.971253	0.350856	0.0556776	0.214554	0.475114	0.554106	0.622174	0.493862	0.455448	0.736546	0.709295
									0.155667	0.843333	0.946667	0.213333
HenC	rep.1	82.1	48.1	7.68	5.93	4.45	4.42	5.02	3.14	3.26	3.32	3.97	3.45
	rep.2	79.9	49.5	9.47	4.91	3.84	4.64	5.19	3.23	3.34	3.63	3.91	4.56
	rep.3	89.2	45.7	8.06	5.82	4.55	5.29	5.23	2.38	3.18	3.36	4.16	3.83
	control	91.55	52.3	27.5	20.6	9.92333	8.21	4.98333	2.68	1.39667	0.863333	0.596667	0.47
	rep.1 - control	-9.45	-4.2	-19.82	-14.67	-5.47333	-3.79	0.0366667	0.46	1.86333	2.45667	3.37333	2.98
	rep.2 - control	-11.65	-2.8	-18.03	-15.69	-6.08333	-3.57	0.206667	0.55	1.94333	2.76667	3.31333	4.09
	rep.3 - control	-2.35	-6.6	-19.44	-14.78	-5.37333	-2.92	0.246667	-0.3	1.78333	2.49667	3.56333	3.36
	Average	-7.81667	-4.53333	-19.0967	-15.0467	-5.64333	-3.42667	0.163333	0.236667	1.86333	2.57333	3.41667	3.47667
	SD	4.86038	1.9218	0.943098	0.559851	0.384318	0.452364	0.111505	0.46694	0.08	0.168622	0.130512	0.564122
									1.62667	0.71	0.843333	0.06
HenH	rep.1	80.2	68.7	6.79	6.2	7.36	6.61	5.22	4.79	4.89	4.2	3.92	3.22
	rep.2	92.1	64.5	8.41	5.55	7.35	6.96	5.72	4.68	4.55	4.39	4.2	3.5
	rep.3	85.1	74.5	6.74	5.33	7.01	6.4	5.93	4.02	4.38	3.35	3.2	4.84
	control	97.2	76.95	22.7667	15.8833	11.3833	7.55667	4.72333	2.61333	1.51667	0.876667	0.626667	0.516667
	rep.1 - control	-17	-8.25	-15.9767	-9.68333	-4.02333	-0.946667	0.496667	2.17667	3.37333	3.32333	3.29333	2.70333
	rep.2 - control	-5.1	-12.45	-14.3567	-10.3333	-4.03333	-0.596667	0.996667	2.06667	3.03333	3.51333	3.57333	2.98333
	rep.3 - control	-12.1	-2.45	-16.0267	-10.5533	-4.37333	-1.15667	1.20667	1.40667	2.86333	2.47333	2.57333	4.32333
	Average	-11.4	-7.71667	-15.4533	-10.19	-4.14333	-0.9	0.9	1.88333	3.09	3.10333	3.14667	3.33667
	SD	5.9808	5.02129	0.95007	0.452364	0.199249	0.282902	0.364737	0.416453	0.259679	0.553805	0.515881	0.865871
								0.983333	1.20667	0.0133333	0.0433333	0.19
HenW	rep.1	79.1	42.2	10.12	4.68	3.13	2.19	2.26	1.64	1.56	1.68	2.98	3.66
	rep.2	80.2	45.1	7.45	4.66	3.65	2.56	2.03	1.67	1.68	2.81	3.24	3.84
	rep.3	78.5	48.2	7.27	4.24	2.8	2.74	2	2.46	3.24	2.85	3.12	3.81
	control	91.05	54.75	18.4467	8.33667	5.73	3.15667	1.91667	1.33667	0.78	0.563333	0.463333	0.386667
	rep.1 - control	-11.95	-12.55	-8.32667	-3.65667	-2.6	-0.966667	0.343333	0.303333	0.78	1.11667	2.51667	3.27333
	rep.2 - control	-10.85	-9.65	-10.9967	-3.67667	-2.08	-0.596667	0.113333	0.333333	0.9	2.24667	2.77667	3.45333
	rep.3 - control	-12.55	-6.55	-11.1767	-4.09667	-2.93	-0.416667	0.0833333	1.12333	2.46	2.28667	2.65667	3.42333
	Average	-11.7833	-9.58333	-10.1667	-3.81	-2.53667	-0.66	0.18	0.586667	1.38	1.88333	2.65	3.38333
	SD	0.862168	3.00056	1.59603	0.248462	0.428525	0.280416	0.142244	0.465009	0.93723	0.664254	0.130128	0.0964365
								0.406667	0.793333	0.503333	0.766667	0.733333
Extract		K.pneumoniae
		concentration of extract (mg/ml)
		150	75	37.5	18.75	9.375	4.6875	2.34375	1.17188	0.585938	0.292969	0.146484	0.0732422
HenE	rep.1	80.5	29.1	5.38	2.39	3.02	3.12	3.03	2.47	3	3.14	3.43	3.43
	rep.2	78.1	28.5	5.24	2.04	2.97	2.83	2.5	2.64	3.1	3.21	3.4	3.32
	rep.3	70.8	30.4	4.79	2.27	2.46	2.57	2.6	2.85	2.5	2.45	2.93	3.45
	control	84.15	32.93	14.2667	3.50667	2.44	2.05	1.87	1.56567	1.37	0.933333	0.63	0.436667
	rep.1 - control	-3.65	-3.83	-8.88667	-1.11667	0.58	1.07	1.16	0.904333	1.63	2.20667	2.8	2.99333
	rep.2 - control	-6.05	-4.43	-9.02667	-1.46667	0.53	0.78	0.63	1.07433	1.73	2.27667	2.77	2.88333
	rep.3 - control	-13.35	-2.53	-9.47667	-1.23667	0.02	0.52	0.73	1.28433	1.13	1.51667	2.3	3.01333
	Average	-7.68333	-3.59667	-9.13	-1.27333	0.376667	0.79	0.84	1.08767	1.49667	2	2.62333	2.96333
	SD	5.05206	0.971253	0.308275	0.177858	0.309892	0.275136	0.281603	0.190351	0.321455	0.42004	0.280416	0.07
						0.413333	0.05	0.247667	0.409	0.503333	0.623333	0.34
HenM	rep.1	70.5	38.5	4.76	2.31	4	3.5	3.2	2.88	2.85	3.08	3.14	3.52
	rep.2	78.2	32.6	4.45	2.27	3.62	3.66	3.74	3.41	2.73	2.63	2.92	3.12
	rep.3	80.9	40.8	5.7	2.53	2.6	2.4	2.88	2.12	2.07	2.86	2.88	2.94
	control	88.85	43.5	14.77	5.28	3.21667	2.56667	2.55333	1.51533	0.976667	0.726667	0.52	0.406667
	rep.1 - control	-18.35	-5	-10.01	-2.97	0.783333	0.933333	0.646667	1.36467	1.87333	2.35333	2.62	3.11333
	rep.2 - control	-10.65	-10.9	-10.32	-3.01	0.403333	1.09333	1.18667	1.89467	1.75333	1.90333	2.4	2.71333
	rep.3 - control	-7.95	-2.7	-9.07	-2.75	-0.616667	-0.166667	0.326667	0.604667	1.09333	2.13333	2.36	2.53333
	Average	-12.3167	-6.2	-9.8	-2.91	0.19	0.62	0.72	1.288	1.57333	2.13	2.46	2.78667
	SD	5.3966	4.22966	0.650922	0.14	0.723971	0.685954	0.434665	0.648408	0.42	0.225019	0.14	0.296873
						0.43	0.1	0.568	0.285333	0.556667	0.33	0.326667
HenC	rep.1	88.5	50.8	9.7	20.8	9.99	8.71	5.36	5.07	4.91	4.92	4.85	4.98
	rep.2	79.9	49.6	9.38	21.3	10.1	8.97	5.38	4.75	4.12	4.32	4.16	3.89
	rep.3	89.4	45.7	9.53	20.8	10.3	8.02	4.5	4.03	3.62	3.54	3.4	3.11
	control	91.5	52.3	27.5	20.6	9.92333	8.21	4.98333	2.68	1.39667	0.863333	0.596667	0.47
	rep.1 - control	-3	-1.5	-17.8	0.2	0.0666667	0.5	0.376667	2.39	3.51333	4.05667	4.25333	4.51
	rep.2 - control	-11.6	-2.7	-18.12	0.7	0.176667	0.76	0.396667	2.07	2.72333	3.45667	3.56333	3.42
	rep.3 - control	-2.1	-6.6	-17.97	0.2	0.376667			1.35	2.22333	2.67667	2.80333	2.64
	Average	-5.56667	-3.6	-17.9633	0.366667	0.206667	0.63	0.386667	1.93667	2.82	3.39667	3.54	3.52333
	SD	5.24436	2.66646	0.160104	0.288675	0.157162	0.183848	0.0141421	0.532666	0.65041	0.691954	0.725282	0.939273
									0.883333	0.576667	0.143333	-0.0166667
HenH	rep.1	88.3	71.2	9.94	16.78	12.1	7.91	5.34	4.72	4.66	4.53	4.35	4.96
	rep.2	95.6	65.5	9.37	15.9	11.8	7.89	5.5	4.39	4.19	3.98	3.86	3.74
	rep.3	85.1	74.5	8.2	15.1	11.5	8.01	5.48	3.42	3.53	3.27	3.29	3.09
	control	97.2	76.95	22.7667	15.8833	11.3833	7.55667	4.72333	2.61333	1.51667	0.876667	0.626667	0.516667
	rep.1 - control	-8.9	-5.75	-12.8267	0.896667	0.716667	0.353333	0.616667	2.10667	3.14333	3.65333	3.72333	4.44333
	rep.2 - control	-1.6	-11.45	-13.3967	0.0166667	0.416667	0.333333	0.776667	1.77667	2.67333	3.10333	3.23333	3.22333
	rep.3 - control	-12.1	-2.45	-14.5667		0.116667	0.453333	0.756667	0.806667	2.01333	2.39333	2.66333	2.57333
	Average	-7.53333	-6.55	-13.5967	0.456667	0.416667	0.38	0.716667	1.56333	2.61	3.05	3.20667	3.41333
	SD	5.38176	4.55302	0.887074	0.622254	0.3	0.064291	0.087178	0.675747	0.567656	0.631691	0.530503	0.949368
HenW	rep.1	81.5	51.2	10.23	7.51	6.38	4.79	4.23	4.55	4.14	4.01	3.88	4.12
	rep.2	75.6	42.5	8.76	6.49	6.62	3.53	4.02	4.25	3.83	3.42	3.38	3.13
	rep.3	78.8	48.2	8.15	7.77	6.61	4.33	3.3	3.12	2.99	2.83	2.75	2.73
	control	91.05	54.75	18.4467	8.33667	5.73	3.15667	1.91667	1.33667	0.78	0.563333	0.463333	0.386667
	rep.1 - control	-9.55	-3.55	-8.21667	-0.826667	0.65	1.63333	2.31333	3.21333	3.36	3.44667	3.41667	3.73333
	rep.2 - control	-15.45	-12.25	-9.68667	-1.84667	0.89	0.373333	2.10333	2.91333	3.05	2.85667	2.91667	2.74333
	rep.3 - control	-12.25	-6.55	-10.2967	-0.566667	0.88	1.17333	1.38333	1.78333	2.21	2.26667	2.28667	2.34333
	Average	-12.4167	-7.45	-9.4	-1.08	0.806667	1.06	1.93333	2.63667	2.87333	2.85667	2.87333	2.94
	SD	2.95353	4.41928	1.06922	0.67656	0.135769	0.6376	0.48775	0.754078	0.595007	0.59	0.566245	0.715565
							0.873333	0.703333
Extract		P.aeruginosa
		concentration of extract (mg/ml)
		150	75	37.5	18.75	9.375	4.6875	2.34375	1.17188	0.585938	0.292969	0.146484	0.0732422
HenE	rep.1	77.9	28.7	9.17	3.35	2.12	2.01	2.03	2.2	2.93	2.94	3.33	2.94
	rep.2	78.1	30.1	8.21	3.17	2.38	1.62	2.42	2.07	2.19	2.46	3.18	3.85
	rep.3	80.2	29.8	6.82	2.88	2.21	1.54	2.19	1.64	1.84	2.01	2.1	3.76
	control	84.15	32.9	14.2667	3.50667	2.44	2.05	1.87	1.56567	1.37	0.933333	0.63	0.436667
	rep.1 - control	-6.25	-4.2	-5.09667	-0.156667	-0.32	-0.04	0.16	0.634333	1.56	2.00667	2.7	2.50333
	rep.2 - control	-6.05	-2.8	-6.05667	-0.336667	-0.06	-0.43	0.55	0.504333	0.82	1.52667	2.55	3.41333
	rep.3 - control	-3.95	-3.1	-7.44667	-0.626667	-0.23	-0.51	0.32	0.0743333	0.47	1.07667	1.47	3.32333
	Average	-5.41667	-3.36667	-6.2	-0.373333	-0.203333	-0.326667	0.343333	0.404333	0.95	1.53667	2.24	3.08
	SD	1.2741	0.737111	1.18154	0.237136	0.132035	0.251462	0.196044	0.293087	0.556507	0.465081	0.671044	0.501431
									0.545667	0.98016	0.703333	0.84
HenM	rep.1	81.8	42.2	4.12	2.02	1.75	1.62	2.74	1.34	2.19	2.94	2.94	3.52
	rep.2	88.1	41.7	4.17	2.14	2	1.71	2.65	1.64	2.6	2.98	3.11	3.92
	rep.3	85.2	40.6	5.17	2.22	2.48	1.9	2.89	1.94	3.03	3	3.18	4.11
	control	88.85	43.5	14.77	5.28	3.21667	2.56667	2.55333	1.51533	0.976667	0.726667	0.52	0.406667
	rep.1 - control	-7.05	-1.3	-10.65	-3.26	-1.46667	-0.946667	0.186667		1.21333	2.21333	2.42	3.11333
	rep.2 - control	-0.75	-1.8	-10.6	-3.14	-1.21667	-0.856667	0.0966667	0.124667	1.62333	2.25333	2.59	3.51333
	rep.3 - control	-3.65	-2.9	-9.6	-3.06	-0.736667	-0.666667	0.336667	0.424667	2.05333	2.27333	2.66	3.70333
	Average	-3.81667	-2	-10.2833	-3.15333	-1.14	-0.823333	0.206667	0.274667	1.63	2.24667	2.55667	3.44333
	SD	3.15331	0.818535	0.592312	0.100664	0.37099	0.142945	0.121244	0.212132	0.42004	0.0305505	0.123423	0.301164
									1.35533	0.616667	0.31	0.886667
HenC	rep.1	85.5	50.4	5.64	5.17	3.12	8	5.78	5.19	4.51	4.74	4.61	4.32
	rep.2	79.9	48.2	5.64	5.16	2.23	8.42	5.43	4.86	4.51	4.68	4.3	4.78
	rep.3	89.4	46.7	5.99	5.54	3.44	8.56	5.47	4.87	4.75	4.88	4.66	4.91
	control	91.55	52.3	27.5	20.6	9.92333	8.21	4.98333	2.68	1.39667	0.863333	0.596667	0.47
	rep.1 - control	-6.05	-1.9	-21.86	-15.43	-6.80333		0.796667	2.51	3.11333	3.87667	4.01333	3.85
	rep.2 - control	-11.65	-4.1	-21.86	-15.44	-7.69333	0.21	0.446667	2.18	3.11333	3.81667	3.70333	4.31
	rep.3 - control	-2.15	-5.6	-21.51	-15.06	-6.48333	0.35	0.486667	2.19	3.35333	4.01667	4.06333	4.44
	Average	-6.61667	-3.86667	-21.7433	-15.31	-6.99333	0.28	0.576667	2.29333	3.19333	3.90333	3.92667	4.2
	SD	4.77528	1.861	0.202073	0.216564	0.626977	0.0989949	0.191572	0.187705	0.138564	0.102632	0.195021	0.31
									0.9	0.71	0.0233333	0.273333
HenH	rep.1	80.2	70.7	9.42	5.9	2.85	7.86	4.91	4.41	4.47	4.26	5.32	5.18
	rep.2	92.1	60.2	8.4	5.44	1.85	7.18	5.04	4.1	4.34	4.12	4.48	4.6
	rep.3	85.1	74.5	7.83	5.07	1.12	7.75	4.88	3.88	3.94	3.96	4.36	4.58
	control	97.2	76.95	22.7667	15.8833	11.3833	7.55667	4.72333	2.61333	1.51667	0.876667	0.626667	0.516667
	rep.1 - control	-17	-6.25	-13.3467	-9.98333	-8.53333	0.303333	0.186667	1.79667	2.95333	3.38333	4.69333	4.66333
	rep.2 - control	-5.1	-16.75	-14.3667	-10.4433	-9.53333		0.316667	1.48667	2.82333	3.24333	3.85333	4.08333
	rep.3 - control	-12.1	-2.45	-14.9367	-10.8133	-10.2633	0.193333	0.156667	1.26667	2.42333	3.08333	3.73333	4.06333
	Average	-11.4	-8.48333	-14.2167	-10.4133	-9.44333	0.248333	0.22	1.51667	2.73333	3.23667	4.09333	4.27
	SD	5.9808	7.40698	0.805543	0.415812	0.868504	0.0777817	0.085049	0.266271	0.276225	0.150111	0.523068	0.340783
									1.21667	0.503333	0.856667	0.176667
HenW	rep.1	79.1	42.2	8.86	3.73	2.24	3.29	2.12	2.38	3.07	3.38	3.31	3.76
	rep.2	80.2	45.1	8.8	4.25	2.33	3.88	2.76	2.75	3.12	3.47	3.5	4.37
	rep.3	78.5	48.2	7.56	3.62	2.13	3.21	1.99	2.21	2.63	2.82	2.8	3.13
	control	91.05	54.75	18.4467	8.33667	5.73	3.15667	1.91667	1.33667	0.78	0.563333	0.463333	0.386667
	rep.1 - control	-11.95	-12.55	-9.58667	-4.60667	-3.49	0.133333	0.203333	1.04333	2.29	2.81667	2.84667	3.37333
	rep.2 - control	-10.85	-9.65	-9.64667	-4.08667	-3.4	0.723333	0.843333	1.41333	2.34	2.90667	3.03667	3.98333
	rep.3 - control	-12.55	-6.55	-10.8867	-4.71667	-3.6	0.0533333	0.0733333	0.873333	1.85	2.25667	2.33667	2.74333
	Average	-11.7833	-9.58333	-10.04	-4.47	-3.49667	0.303333	0.373333	1.11	2.16	2.66	2.74	3.36667
	SD	0.862168	3.00056	0.733848	0.336502	0.100167	0.365923	0.412189	0.276104	0.269629	0.352184	0.361985	0.620027
								0.736667	1.05	0.5	0.08	0.626667
Extract		E.coli
		concentration of extract (mg/ml)
		150	75	37.5	18.75	9.375	4.6875	2.34375	1.17188	0.585938	0.292969	0.146484	0.0732422
HenE	rep.1	90.6	35.6	9.02	2.37	2.84	3.67	3.33	3.18	3.1	3.04	3.16	3.48
	rep.2	81.2	32.6	8.43	2.32	2.68	3.09	3	2.98	2.94	2.76	3.03	3.36
	rep.3	80.3	33	9.94	2.53	3.44	3.91	3.57	3.6	3.47	3.54	3.86	4.75
	control	84.15	32.93	14.2667	3.50667	2.44	2.05	1.87	1.56567	1.37	0.933333	0.63	0.436667
	rep.1 - control	6.45	2.67	-5.24667	-1.13667	0.4	1.62	1.46	1.61433	1.73	2.10667	2.53	3.04333
	rep.2 - control	-2.95	-0.33	-5.83667	-1.18667	0.24	1.04	1.13	1.41433	1.57	1.82667	2.4	2.92333
	rep.3 - control	-3.85	0.07	-4.32667	-0.976667	1	1.86	1.7	2.03433	2.1	2.60667	3.23	4.31333
	Average	-0.116667	0.803333	-5.13667	-1.1	0.546667	1.50667	1.43	1.68767	1.8	2.18	2.72	3.42667
	SD	5.70468	1.62891	0.760986	0.109697	0.400666	0.421584	0.286182	0.316439	0.271846	0.395137	0.44643	0.770216
						0.96	-0.0766667	0.257667	0.112333	0.38	0.54	0.706667
HenM	rep.1	81.5	38.8	5.12	2.37	3.06	3.71	3.37	3.21	3.12	3.16	3.97	3.76
	rep.2	74.4	40.5	4.44	1.98	2.84	3.06	3.36	2.97	2.96	2.9	3.5	3.71
	rep.3	78.2	37.6	5.87	2.63	3.12	3.8	4.07	3.39	3.41	3.55	3.89	3.83
	control	88.85	43.5	14.77	5.28	3.21667	2.56667	2.55333	1.51533	0.976667	0.726667	0.52	0.406667
	rep.1 - control	-7.35	-4.7	-9.65	-2.91	-0.156667	1.14333	0.816667	1.69467	2.14333	2.43333	3.45	3.35333
	rep.2 - control	-14.45	-3	-10.33	-3.3	-0.376667	0.493333	0.806667	1.45467	1.98333	2.17333	2.98	3.30333
	rep.3 - control	-10.65	-5.9	-8.9	-2.65	-0.0966667	1.23333	1.51667	1.87467	2.43333	2.82333	3.37	3.42333
	Average	-10.8167	-4.53333	-9.62667	-2.95333	-0.21	0.956667	1.04667	1.67467	2.18667	2.47667	3.26667	3.36
	SD	3.55293	1.45717	0.715285	0.327159	0.147422	0.403774	0.407063	0.210713	0.228108	0.327159	0.251462	0.0602771
							0.09	0.628	0.512	0.29	0.79	0.0933333
HenC	rep.1	89.2	50.9	8.22	19.8	10.8	9.32	5.91	5.13	4.72	4.19	4.28	4.24
	rep.2	88	54.5	9.46	18.7	11.1	8.82	6.63	5.2	4.8	4.55	4.4	5.21
	rep.3	90.7	52.2	8.92	19.2	10.2	8.95	5.91	4.76	4.28	4.13	4.08	4.04
	control	91.55	52.3	27.5	20.6	9.92333	8.21	4.98333	2.68	1.39667	0.863333	0.596667	0.47
	rep.1 - control	-2.35	-1.4	-19.28	-0.8	0.876667	1.11	0.926667	2.45	3.32333	3.32667	3.68333	3.77
	rep.2 - control	-3.55	2.2	-18.04	-1.9	1.17667	0.61	1.64667	2.52	3.40333	3.68667	3.80333	4.74
	rep.3 - control	-0.85	-0.1	-18.58	-1.4	0.276667	0.74	0.926667	2.08	2.88333	3.26667	3.48333	3.57
	Average	-2.25	0.233333	-18.6333	-1.36667	0.776667	0.82	1.16667	2.35	3.20333	3.42667	3.65667	4.02667
	SD	1.35277	1.823	0.621718	0.550757	0.458258	0.259422	0.415692	0.236432	0.28	0.227156	0.161658	0.625806
								1.18333	0.853333	0.223333	0.23	0.37
HenH	rep.1	90.2	69.3	7.18	14.8	12.2	8.25	6.23	4.66	4.41	4.46	4.18	4.03
	rep.2	93.1	70.5	7.55	15.2	12	8.02	6.62	4.97	4.52	4.5	4.6	4.33
	rep.3	99	77.2	7.55	12.2	11.89	8.52	6.58	5.32	4.61	4.53	5.17	5.71
	control	97.2	76.95	22.7667	15.8833	11.3833	7.55667	4.72333	2.61333	1.51667	0.876667	0.626667	0.516667
	rep.1 - control	-7	-7.65	-15.5867	-1.08333	0.816667	0.693333	1.50667	2.04667	2.89333	3.58333	3.55333	3.51333
	rep.2 - control	-4.1	-6.45	-15.2167	-0.683333	0.616667	0.463333	1.89667	2.35667	3.00333	3.62333	3.97333	3.81333
	rep.3 - control	1.8	0.25	-15.2167	-3.68333	0.506667	0.963333	1.85667	2.70667	3.09333	3.65333	4.54333	5.19333
	Average	-3.1	-4.61667	-15.34	-1.81667	0.646667	0.706667	1.75333	2.37	2.99667	3.62	4.02333	4.17333
	SD	4.48442	4.25715	0.21362	1.62891	0.157162	0.250267	0.214554	0.330202	0.100167	0.0351188	0.49689	0.895991
											0.403333	0.15
HenW	rep.1	90.8	52.3	7.5	5.22	4.23	5.64	4.92	4.68	4.79	4.31	4.28	4.15
	rep.2	89.5	50.2	7.33	5.15	3.93	5.93	4.62	4.03	3.68	4.07	3.95	4.09
	rep.3	85.1	53.9	8.92	5.85	4.63	5.82	4.74	4.19	4.1	4.13	4.03	4.13
	control	91.05	54.75	18.4467	8.33667	5.73	3.15667	1.91667	1.33667	0.78	0.563333	0.463333	0.386667
	rep.1 - control	-0.25	-2.45	-10.9467	-3.11667	-1.5	2.48333	3.00333	3.34333	4.01	3.74667	3.81667	3.76333
	rep.2 - control	-1.55	-4.55	-11.1167	-3.18667	-1.8	2.77333	2.70333	2.69333	2.9	3.50667	3.48667	3.70333
	rep.3 - control	-5.95	-0.85	-9.52667	-2.48667	-1.1	2.66333	2.82333	2.85333	3.32	3.56667	3.56667	3.74333
	Average	-2.58333	-2.61667	-10.53	-2.93	-1.46667	2.64	2.84333	2.96333	3.41	3.60667	3.62333	3.73667
	SD	2.98719	1.85562	0.87306	0.38553	0.351188	0.146401	0.150997	0.338674	0.560446	0.1249	0.172143	0.0305505
Extract		S.typhimurium
		concentration of extract (mg/ml)
		150	75	37.5	18.75	9.375	4.6875	2.34375	1.17188	0.585938	0.292969	0.146484	0.0732422
HenE	rep.1	75.2	28.2	9.71	3.6	1.94	1.85	2.95	2.4	2.39	2.78	2.85	3
	rep.2	74.1	25.1	8.01	1.97	1.98	1.98	2.87	2.66	2.43	2.68	2.8	2.82
	rep.3	80.2	29.8	8.24	2.45	1.83	2	2.41	2.74	2.38	2.45	2.5	2.49
	control	84.15	32.93	14.2667	3.50667	2.44	2.05	1.87	1.56567	1.37	0.933333	0.63	0.436667
	rep.1 - control	-8.95	-4.73	-4.55667	0.0933333	-0.5	-0.2	1.08	0.834333	1.02	1.84667	2.22	2.56333
	rep.2 - control	-10.05	-7.83	-6.25667	-1.53667	-0.46	-0.07	1	1.09433	1.06	1.74667	2.17	2.38333
	rep.3 - control	-3.95	-3.13	-6.02667	-1.05667	-0.61	-0.05	0.54	1.17433	1.01	1.51667	1.87	2.05333
	Average	-7.65	-5.23	-5.61333	-0.833333	-0.523333	-0.106667	0.873333	1.03433	1.03	1.70333	2.08667	2.33333
	SD	3.25115	2.38956	0.922298	0.837636	0.0776745	0.0814453	0.291433	0.177764	0.0264575	0.169214	0.189297	0.25865
							0.98	0.161	-0.00433333	0.673333	0.383333	0.246667
HenM	rep.1	74.1	42.5	3.78	2.33	2.76	2.51	2.75	2.14	1.98	2.21	2.26	2.6
	rep.2	72.6	32.2	3.25	2.53	2.84	2.2	3.07	2	2.27	2.41	2.45	2.68
	rep.3	80	38.7	4.8	2.55	3.15	2.28	3.14	2.33	2.09	2.61	3.32	3.8
	control	88.85	43.5	14.77	5.28	3.21667	2.56667	2.55333	1.51533	0.976667	0.726667	0.52	0.406667
	rep.1 - control	-14.75	-1	-10.99	-2.95	-0.456667	-0.0566667	0.196667	0.624667	1.00333	1.48333	1.74	2.19333
	rep.2 - control	-16.25	-11.3	-11.52	-2.75	-0.376667	-0.366667	0.516667	0.484667	1.29333	1.68333	1.93	2.27333
	rep.3 - control	-8.85	-4.8	-9.97	-2.73	-0.0666667	-0.286667	0.586667	0.814667	1.11333	1.88333	2.8	3.39333
	Average	-13.2833	-5.7	-10.8267	-2.81	-0.3	-0.236667	0.433333	0.641333	1.13667	1.68333	2.15667	2.62
	SD	3.91195	5.20865	0.787803	0.121655	0.205994	0.160935	0.207926	0.16563	0.146401	0.2	0.565184	0.67092
							0.67	0.208	0.495333	0.546667	0.473333	0.463333
HenC	rep.1	88.3	50.2	7.45	6.31	6.11	8.49	5.7	5.27	4.58	3.82	3.63	4.66
	rep.2	80.9	42.2	7.47	4.81	5.26	8.76	5.64	4.81	4.25	4.21	4.47	4.19
	rep.3	79.4	45.4	9.06	6.45	6.95	8.71	5.95	4.93	4.58	5.33	4.77	4.91
	control	91.55	52.3	27.5	20.6	9.92333	8.21	4.98333	2.68	1.39667	0.863333	0.596667	0.47
	rep.1 - control	-3.25	-2.1	-20.05	-14.29	-3.81333	0.28	0.716667	2.59	3.18333	2.95667	3.03333	4.19
	rep.2 - control	-10.65	-10.1	-20.03	-15.79	-4.66333	0.55	0.656667	2.13	2.85333	3.34667	3.87333	3.72
	rep.3 - control	-12.15	-6.9	-18.44	-14.15	-2.97333	0.5	0.966667	2.25	3.18333	4.46667	4.17333	4.44
	Average	-8.68333	-6.36667	-19.5067	-14.7433	-3.81667	0.443333	0.78	2.32333	3.07333	3.59	3.69333	4.11667
	SD	4.7648	4.02658	0.923815	0.909139	0.845005	0.143643	0.164418	0.238607	0.190526	0.783858	0.590931	0.365559
								1.54333	0.75	0.516667	0.103333	0.423333
HenH	rep.1	80.2	62.1	12.32	5.23	4.23	7.64	4.78	4.28	4	3.56	3.57	3.7
	rep.2	92.1	65.5	12.78	6.12	5.13	7.81	4.98	4.94	4.79	3.78	4.38	4.43
	rep.3	85.1	60.7	14.58	6.23	5.17	7.48	5.1	4.95	5.04	4.77	4.72	4.69
	control	97.2	76.95	22.7667	15.8833	11.3833	7.55667	4.72333	2.61333	1.51667	0.876667	0.626667	0.516667
	rep.1 - control	-17	-14.85	-10.4467	-10.6533	-7.15333	0.0833333	0.0566667	1.66667	2.48333	2.68333	2.94333	3.18333
	rep.2 - control	-5.1	-11.45	-9.98667	-9.76333	-6.25333	0.253333	0.256667	2.32667	3.27333	2.90333	3.75333	3.91333
	rep.3 - control	-12.1	-16.25	-8.18667	-9.65333	-6.21333	-0.0766667	0.376667	2.33667	3.52333	3.89333	4.09333	4.17333
	Average	-11.4	-14.1833	-9.54	-10.0233	-6.54	0.0866667	0.23	2.11	3.09333	3.16	3.59667	3.75667
	SD	5.9808	2.46847	1.19438	0.548361	0.531539	0.165025	0.161658	0.38397	0.542863	0.644541	0.59079	0.513258
								1.88	0.983333	0.0666667	0.436667	0.16
HenW	rep.1	79.1	42.2	8.5	4.36	3.36	3.28	2.89	2.61	2.31	2.48	2.48	2.45
	rep.2	80.2	45.1	9.37	4.42	3.48	3.17	3.72	2.81	2.59	3.12	2.94	2.72
	rep.3	78.5	48.2	9.68	4.86	3.7	3.47	3.82	2.89	2.84	3.24	3.71	3.83
	control	91.05	54.75	18.4467	8.33667	5.73	3.15667	1.91667	1.33667	0.78	0.563333	0.463333	0.386667
	rep.1 - control	-11.95	-12.55	-9.94667	-3.97667	-2.37	0.123333	0.973333	1.27333	1.53	1.91667	2.01667	2.06333
	rep.2 - control	-10.85	-9.65	-9.07667	-3.91667	-2.25	0.0133333	1.80333	1.47333	1.81	2.55667	2.47667	2.33333
	rep.3 - control	-12.55	-6.55	-8.76667	-3.47667	-2.03	0.313333	1.90333	1.55333	2.06	2.67667	3.24667	3.44333
	Average	-11.7833	-9.58333	-9.26333	-3.79	-2.21667	0.15	1.56	1.43333	1.8	2.38333	2.58	2.61333
	SD	0.862168	3.00056	0.611746	0.273008	0.172434	0.151767	0.510523	0.144222	0.265141	0.408575	0.621477	0.731369
							1.41	-0.126667	0.366667	0.583333	0.196667	0.0333333

## Sheet: Antifungal
A.niger
	rep.1	rep.2	rep.3	average	sd	%sd
HenE	77.7251	78.0876	74.569	76.7939	1.93537	2.52021
HenM	65.873	66.1355	68.5345	66.8477	1.46672	2.19412
HenC	44.0415	46.8254	38.8626	43.2431	4.041	9.34483
HenH	36.658	32.5397	32.6693	33.9557	2.3412	6.89488
HenW	36.2694	35.0598	32.7586	34.6959	1.78346	5.14025
ketoconazole	65.9091	82	76.8595	74.9229	8.21841
Penicillium
	rep.1	rep.2	rep.3	average	sd	%sd
HenE	96.9697	96.5517	98.2759	97.2658	0.899391	0.924673
HenM	66.6667	79.3103	81.0345	75.6705	7.84506	10.3674
HenC	16.6667	19.2982	17.2414	17.7354	1.38361	7.80137
HenH	33.3333	32.7586	29.3103	31.8008	2.17583	6.84206
HenW	25.7576	26.3158	27.5862	26.5532	0.937146	3.52932
ketoconazole	66.6667	77.0833	66.6667	70.1389	6.01407
Fusarium
	rep.1	rep.2	rep.3	average	sd	%sd
HenE	78.2609	80.9524	79.3651	79.5261	1.35296	1.70128
HenM	81.8841	82.5397	81.746	82.0566	0.424024	0.516745
HenC	23.1884	27.7778	26.2774	25.7479	2.34006	9.08837
HenH	26.8116	22.2222	23.8095	24.2811	2.33075	9.59901
HenW	52.8986	53.1746	55.5556	53.8762	1.46087	2.71153
ketoconazole	53.2258	61.6822	57.7586	57.5556	4.23187
Rhizopus
	rep.1	rep.2	rep.3	average	sd	%sd
HenE	62.3762	66.2207	55.516	61.371	5.4227	8.83593
HenM	61.0561	56.5217	64.7687	60.7822	4.13029	6.79523
HenC	31.6832	34.4482	38.0165	34.716	3.17516	9.14612
HenH	26.4026	27.0903	22.0641	25.1857	2.72517	10.8203
HenW	23.1023	23.0769	23.9669	23.3821	0.506683	2.16697
ketoconazole	78.1893	83.9286	78.5714	80.2298	3.20895

[truncated: 5 more sheets: cytotoxicity_A549, Cytotoxicity_A549Rt-eto, cytotoxicity_MDA, cytotoxicity_SW480, Migration]
